1 A Trifactor of New Insights into Ovine Footrot for Infection  
2 Drivers, Immune Response and Host Pathogen Interactions.

3  
4

5 Adam M. Blanchard<sup>1\*</sup>, Ceri E. Staley<sup>1</sup>, Laurence Shaw<sup>2</sup>, Sean R Wattedgedera<sup>3</sup>,  
6 Christina-Marie Baumbach<sup>4</sup>, Jule K. Michler<sup>4</sup>, Catrin Rutland<sup>1</sup>, Charlotte Back<sup>1</sup>,  
7 Nerissa Newbold<sup>1±</sup>, Gary Entrican<sup>3#</sup>, Sabine Töttemeyer<sup>1\*</sup>

8 \*Corresponding authors

9

10 <sup>1</sup>School of Veterinary Medicine and Science, University of Nottingham, Sutton Bonington,  
11 Loughborough, Leicestershire, LE12 5RD.

12 <sup>2</sup>School of Science and Technology, Nottingham Trent University, Nottingham, NG11 8NS

13 <sup>3</sup>Moredun Research Institute, Pentlands Science Park, Bush Loan, Penicuik, Midlothian, Scotland,  
14 EH26 0PZ.

15 <sup>4</sup>Institute of Anatomy, Histology and Embryology, Faculty of Veterinary Medicine, Leipzig University,  
16 Leipzig, Germany

17

18 Current addresses:

19 <sup>±</sup>Bristol Veterinary School, University of Bristol, Langford House, Langford, Somerset, BS40 5DU

20 <sup>#</sup>The Roslin Institute, The University of Edinburgh, Easter Bush, Scotland, EH25 9RG

21

22

## 23 **Abstract**

24 Footrot is a polymicrobial infectious disease in sheep causing severe lameness,  
25 leading to one of the industry's biggest welfare problems. The complex aetiology of  
26 footrot makes in-situ or in-vitro investigations difficult. Computational methods offer a  
27 solution to understanding the bacteria involved, how they may interact with the host  
28 and ultimately providing a way to identify targets for future hypotheses driven  
29 investigative work. Here we present the first combined global analysis of the bacterial  
30 community transcripts together with the host immune response in healthy and  
31 diseased ovine feet during a natural polymicrobial infection state using  
32 metatranscriptomics. The intra tissue and surface bacterial populations and the most  
33 abundant bacterial transcriptome were analysed, demonstrating footrot affected skin  
34 has a reduced diversity and increased abundances of, not only the causative bacteria  
35 *Dichelobacter nodosus*, but other species such as *Mycoplasma fermentans* and  
36 *Porphyromonas asaccharolytica*. Host transcriptomics reveals a suppression of  
37 biological processes relating to skin barrier function, vascular functions, and  
38 immunosurveillance in unhealthy interdigital skin, supported by histological findings  
39 that type I collagen (associated with scar tissue formation) is significantly increased  
40 in footrot affected interdigital skin compared to outwardly healthy skin. Finally, we  
41 provide some interesting indications of host and pathogen interactions associated  
42 with virulence genes and the host spliceosome which could lead to the identification  
43 of future therapeutic targets.

44

## 45 **Impact Statement**

46 Lameness in sheep is a global welfare and economic concern and footrot is the  
47 leading cause of lameness, affecting up to 70% of flocks in the U.K. Current methods

48 for control of this disease are labour intensive and account for approximately 65% of  
49 antibiotic use in sheep farming, whilst preventative vaccines suffer from poor efficacy  
50 due to antigen competition. Our limited understanding of cofounders, such as strain  
51 variation and polymicrobial nature of infection mean new efficacious, affordable and  
52 scalable control measures are not receiving much attention. Here we examine the  
53 surface and intracellular bacterial populations and propose potential interactions with  
54 the host. Identification of these key bacterial species involved in the initiation and  
55 progression of disease and the host immune mechanisms could help form the basis  
56 of new therapies.

57

## 58 **Introduction**

59 Ovine footrot is a persistent animal welfare issue and has a significant financial  
60 burden for farmers due to the cost of preventative footbaths, antibiotic treatments,  
61 and reduced carcass weights at slaughter (1). The causative bacterium  
62 *Dichelobacter nodosus* (*D. nodosus*) has received extensive attention since its  
63 description in the initiation of footrot (2). However, it has been accepted since the  
64 beginning of the 20<sup>th</sup> century that footrot is a polymicrobial disease, with  
65 *Fusobacterium necrophorum* (*F. necrophorum*), *Spirochaeta penortha* (*S. penortha*)  
66 (3), *Treponema podovis* (*T. podovis*) (4) and *Corynebacterium pyogenes* (*C.*  
67 *pyogenes*) (5) proposed as species that can exacerbate the lesions.

68

69 Currently our understanding of bacterial populations associated with footrot is only  
70 based on 16S rRNA analysis from the skin surface (6, 7). The highly abundant  
71 genera identified in the footrot samples were congruent with those identified  
72 previously by standard microbiological techniques (*Corynebacterium*, *Fusobacterium*,

73 *Dichelobacter* and *Treponema*). However, additional genera were also identified  
74 (*Mycoplasma*, *Psychrobacter* and *Porphyromonas*) (7) and their absence using  
75 traditional culture techniques, could be due to the fastidious nature of the bacteria (8)  
76 or that they were not yet identified (9). Investigating the total bacterial load within  
77 tissues, we have shown recently, that in healthy tissues, bacterial load is similar  
78 throughout tissue depth and did not extend beyond the follicular depth in the reticular  
79 dermis. In contrast, in footrot samples, the bacterial load was highest in the  
80 superficial (or cornified) epidermal layers and decreasing in the deeper layers but still  
81 beyond follicular depth (10). This suggests that the infection allows for further  
82 invasion from other species of bacteria to penetrate deeper into the interdigital tissue,  
83 however these data were limited to presence of bacteria based on universal primers  
84 not allowing to identify species.

85

86 There is also a lack of information regarding the host infection, how an immune  
87 response is mounted and the species interactions. This area of investigation has  
88 recently benefitted from the use of metatranscriptomics, a method of assessing host-  
89 pathogen interactions based on associated gene expression changes (11). The use  
90 of metatranscriptomics has been reviewed extensively (12), however, current  
91 published methods are based on, or optimisations of, cell culture models as  
92 developed in the original methods article (11). The use of metatranscriptomics in  
93 natural polymicrobial infections is not as well reported. The first documented use was  
94 in relation to the onset of paediatric asthma (13), and oral disease (14, 15). However,  
95 its application to Bovine Digital Dermatitis (BDD) (16), which has a similar clinical  
96 presentation and bacteria associated with footrot (17–20) highlighted its suitability to  
97 further our understanding of the inter-cellular microbial populations associated with

98 agricultural diseases. Utilising this experimental design, we have been able to  
99 determine the bacterial populations on the surface of the interdigital skin and within  
100 the deeper infected tissue, identify the differential expression of the host transcripts  
101 and elucidate interactions between the host and bacteria.

## 102 **Results**

### 103 ***Sequence data***

104 Foot swabs and whole thickness skin biopsies were collected from sheep post  
105 slaughter that had at least one apparently healthy foot (n=13) and one with signs of  
106 footrot (n=13) to obtain matching samples from the same sheep. After quality filtering  
107 there was an average of 8.7 million discordant ovine reads per sample to be used for  
108 bacterial taxonomic assignment from the foot biopsies, and 20.8 million discordant  
109 ovine reads for the accompanying swabs. All reads had an average phred score of  
110 40. Diversity statistics were calculated for each sample after assignment. Using the  
111 Shannon indices and calculating an equitability score (natural log of the species  
112 richness) representing a maximum diversity, revealed that healthy feet were highly  
113 diverse but footrot feet showed a reduction in diversity (Table 1, Fig 1A). The  
114 Simpson indices also indicated that there was more diversity in the healthy samples  
115 with an average of 0.78 in healthy compared to 0.69 in the footrot biopsies. (Figure  
116 1B). This was furthermore reflected in the swabs with an average of 0.94 in the  
117 healthy samples compared to 0.77 in footrot (Figure 1). The Shannon index showed  
118 a significant difference between the two conditions for both, biopsies ( $p \leq 0.005$ ) and  
119 swabs ( $p \leq 0.05$ ), whereas only the swabs showed a significant difference for the  
120 Simpson index ( $p \leq 0.005$ ; Figure 1).

121

122 **Table 1 Comparison of average calculated and maximum diversity for each**  
 123 **condition.** Demonstrating the overall reduction in bacterial community diversity for  
 124 footrot affected individuals when compared to the calculated maximum diversity  
 125 expected from the data.  
 126  
 127

| Condition | Biopsy<br>Equitability | Biopsy<br>Shannon | Swab<br>Equitability | Swab<br>Shannon |
|-----------|------------------------|-------------------|----------------------|-----------------|
| Healthy   | 3.9                    | 2.5               | 7.1                  | 5.0             |
| Footrot   | 3.3                    | 1.9               | 7.1                  | 3.2             |

128

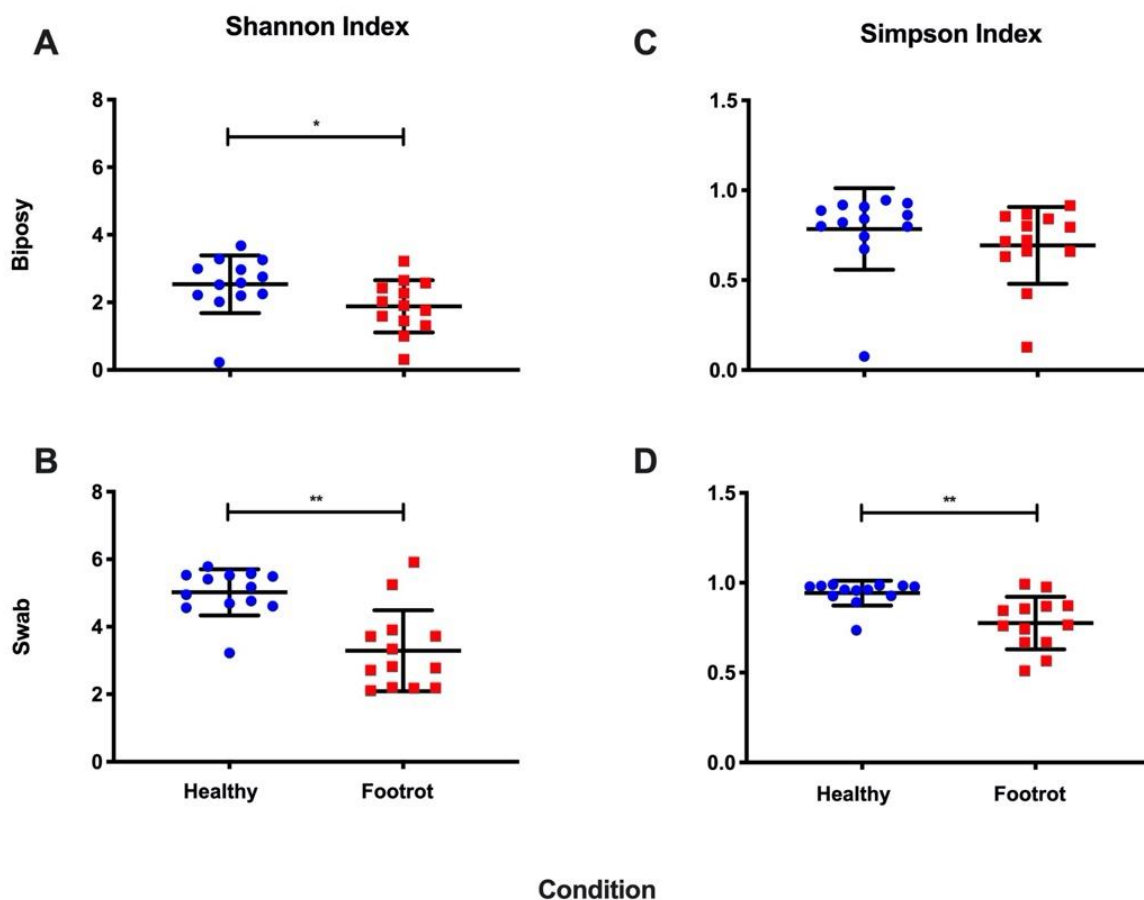

129

130

131 **Figure 1 Diversity statistics for the biopsy and swab samples.** A) Shannon Index  
 132 of biopsy samples, B) Shannon Index of swab samples, C) Simpson Index of biopsy  
 133 samples, D) Simpson index of swab samples. Significant decreases were observed  
 134 from footrot affected samples, for swabs using both Shannon and Simpson indices. A  
 135 significant decrease in footrot affected samples was only observed for biopsies using  
 136 the Shannon index. Statistical significance calculated using Mann Whitney U (\*  
 137  $p=0.05$ , \*\*  $p=0.005$ , \*\*\*  $p=0.0005$ ).

138 **Bacterial community**

139

140 Differences in abundance calculated between the two conditions were identified as  
141 samples having a >2 log fold change, with an FDR (Benjamini-Hochberg) corrected  
142 p-value <0.05 and where average counts had a difference greater than 10 (full  
143 taxonomic assignments are available in Supplementary Table 1 for swabs and  
144 Supplementary Table 2 for biopsies). In swabs, 20 species of bacteria were found in  
145 significantly increased abundance in footrot samples. These included *T. pedis*, *T.*  
146 *denticola*, *D. nodosus*, and *F. necrophorum*, all known to cause various foot diseases  
147 in sheep. Among the bacterial species found in significantly reduced abundance in  
148 footrot samples were ten species of *Staphylococcus* spp., *Bacillus licheniformis*,  
149 *Parageobacillus thermoglucosidasius* and *Nocardiopsis alba*. All differential  
150 abundance data for the swabs are available in Supplementary Table 3.

151

152 Applying the same criteria to biopsies, three species of bacteria were found in  
153 differential abundance between the two conditions, namely *D. nodosus*, *Mycoplasma*  
154 *fermentans* (*M. fermentans*) and *Porphyromonas asaccharolytica* (*P.*  
155 *asaccharolytica*). *D. nodosus* had the most significant increase in footrot biopsies  
156 with a log-fold change increase of 7.0 (p=1.89E-06), *M. fermentans* had a log-fold  
157 change of 6.2 (p=2.59E-05) whilst *P. asaccharolytica* had a log-fold increase of 3.5  
158 (p=0.018). No species were found to be significantly decreased between the two  
159 conditions in the biopsies (all differential abundance data for the biopsies are  
160 available in Supplementary Table 4). Although some archaea were identified in both  
161 biopsy and swab samples, none were significantly more or less abundant in footrot  
162 affected feet compared to healthy feet.

163

164 As short read sequencing has limitations in identifying bacteria to species level, the  
165 most significantly increased abundant bacteria in footrot affected tissues were  
166 confirmed to be *D. nodosus*, *M. fermentans* and *P. asaccharolytica*, by specific  
167 qPCR, species specific PCR and PCR followed by sequencing, respectively. In  
168 addition, *F. nucleatum* was identified as the only *Fusobacterium* species, however  
169 qPCR demonstrated this as misidentification and *F. necrophorum* was present as  
170 expected.

171

## 172 **Comparative analysis of in tissue and surface bacterial communities**

173 The taxonomic assignments from both, swab and biopsy data, were tested to  
174 ascertain whether a clear relationship existed between taxonomic assignments for  
175 the same sheep using both the correlation and similarity hypothesis tests outlined in  
176 the methods section. Under the null hypothesis for the correlation test, there was no  
177 correlation between swab and tissue samples. A p-value of 0.0301 was obtained,  
178 providing strong evidence of a relationship. However, it should be noted that this is  
179 evidence of a relationship in the presence of bacterial species between biopsy and  
180 swab samples rather than them containing the same species.

181 To test the latter claim, the similarity test from the methods section was used. Here,  
182 the null hypothesis was that biopsy and swab samples reveal the presence of the  
183 same bacteria. This test produced a conservative p-value of  $< 10^{-5}$ , providing over  
184 overwhelming evidence that swab and biopsy samples from the same sheep do not  
185 contain the same species of bacteria. Specifically, two random biopsy samples will  
186 have more species in common than a swab and biopsy from the same sheep.



**A**

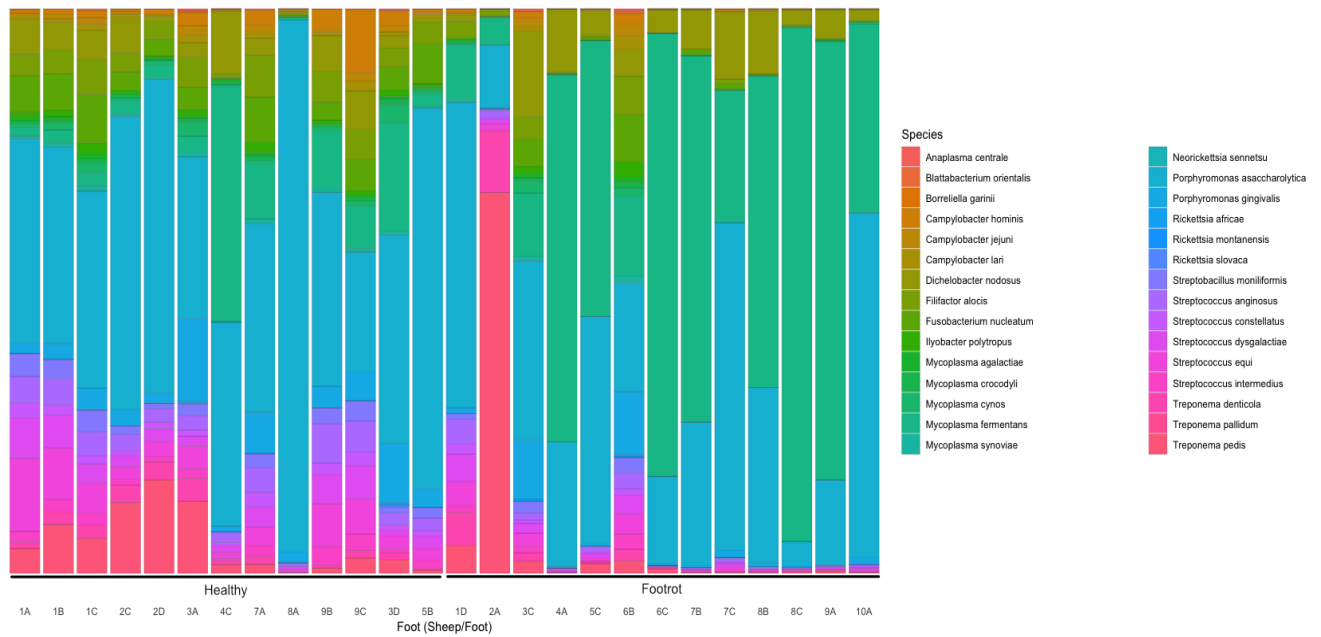

**B**

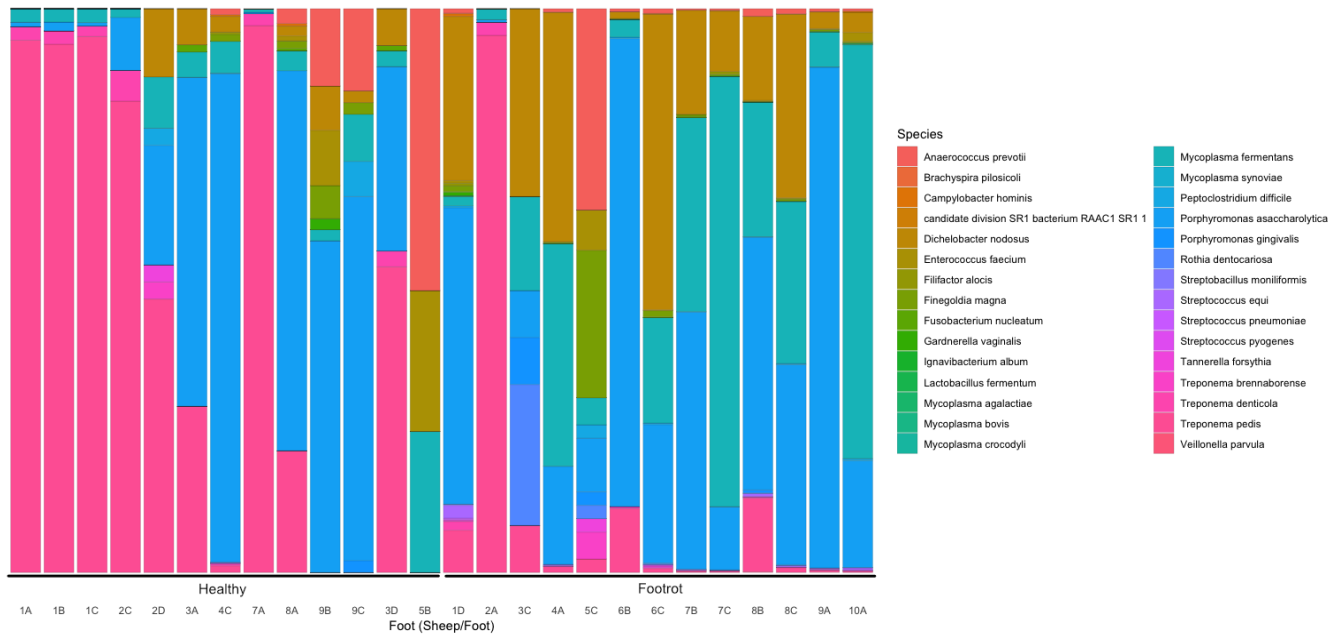

187

188

189 **Figure 2 Species of bacteria identified as increased in abundance in footrot**  
 190 **affected feet when compared to healthy feet. A) Shows the top 30 species of**  
 191 **bacteria in swab samples and B) Shows the top 30 species of bacteria in biopsy**  
 192 **samples.**

193

194 **Differential expression of pro-inflammatory mediators in healthy versus footrot**  
195 **affected interdigital skin.**

196 Among the transcripts that showed increased expression in footrot-affected  
197 interdigital skin were a large number of proteins important for barrier function. These  
198 included proteins involved in collagen production and collagen binding (Procollagen  
199 C-endopeptidase enhancer 2 [PCOLCE2], Collagen Type VI alpha 6 chain, Collagen  
200 Type XXIII alpha 1 chain and keratocan/lumican [collagen-binding leucine-rich  
201 proteoglycans widely distributed in interstitial connective tissues]; cell-cell adhesion  
202 (cadherin[CDH]3, CDH19, pro[P]CDH10); maintenance of cell junctions (GJB4) and  
203 long chain fatty acid synthesis (fatty acid elongase [ELOVL]7, ELOVL3, acyl-CoA  
204 synthetase bubblegum family member [ACSBG]1), and acyl-CoA wax alcohol  
205 acyltransferase [AWAT]1). In addition, transcripts involved in immunosurveillance  
206 such as scavenger receptors SCARA5 and SSC5D were more highly expressed in  
207 footrot affected samples (see Table 2 for top 25 transcripts, Supplementary Table 5  
208 for all transcripts). In contrast, transcripts that showed lower expression compared to  
209 healthy interdigital skin include cytokines involved in wound-healing (IL-19, IL-20)  
210 and keratinocyte proliferation/differentiation (IL-6 and leukaemia inhibitory factor  
211 [LIF]), epithelial cell-derived chemokines that recruit monocytes (CCL2), lymphocytes  
212 (CCL20) and neutrophils (CXCL1, CXCL8) and prostaglandin-endoperoxide synthase  
213 2 (PGE2/COX2), which is also involved in skin wound healing. Another group of  
214 significantly decreased transcripts include matrix metalloproteases (MMP1, MMP3,  
215 MMP9, MMP13, MMP20, (tenascin C) TNC, TIMP1) and their regulators (SERPINE1,  
216 ADAMTS4, ADAMTS16) associated with chronic wounds and collagen turnover (see  
217 Table 3 for top 25 transcripts, Supplementary Table 5 for all transcripts).

218 **Table 2: Top 25 differentially higher expressed genes in footrot affected skin**  
 219 **when compared to healthy skin**

| Gene name | Description                                     | $\beta$ -value | Standard error | q-value  |
|-----------|-------------------------------------------------|----------------|----------------|----------|
| ELOVL7    | ELOVL fatty acid elongase 7                     | 2.812237       | 0.884427       | 0.035516 |
| MNT       | MAX network transcriptional repressor           | 2.415885       | 0.773256       | 0.038156 |
| FRAS1     | Fraser extracellular matrix complex subunit 1   | 2.358302       | 0.738887       | 0.034774 |
| CA6       | carbonic anhydrase 6                            | 2.273248       | 0.686033       | 0.029014 |
| ATP13A4   | ATPase 13A4                                     | 2.261712       | 0.648362       | 0.023149 |
| PNPLA5    | patatin like phospholipase domain containing 5  | 2.230351       | 0.627058       | 0.021215 |
| ELOVL3    | ELOVL fatty acid elongase 3                     | 2.070317       | 0.598268       | 0.02425  |
| STMN2     | stathmin 2                                      | 2.021979       | 0.464736       | 0.007856 |
| NOS1      | nitric oxide synthase 1                         | 2.004654       | 0.546986       | 0.018297 |
| ACSBG1    | acyl-CoA synthetase bubblegum family member 1   | 1.933404       | 0.590342       | 0.030742 |
| AWAT1     | acyl-CoA wax alcohol acyltransferase 1          | 1.849357       | 0.543633       | 0.02594  |
| CCL26     | C-C motif chemokine ligand 26                   | 1.842727       | 0.621591       | 0.046882 |
| CCDC155   | coiled-coil domain containing 155               | 1.791928       | 0.584831       | 0.041351 |
| PI16      | peptidase inhibitor 16                          | 1.765247       | 0.400402       | 0.007477 |
| FAR2      | fatty acyl-CoA reductase 2                      | 1.711846       | 0.519782       | 0.02993  |
| PTX4      | pentraxin 4                                     | 1.681009       | 0.336588       | 0.004979 |
| LRRC36    | leucine rich repeat containing 36               | 1.669794       | 0.465845       | 0.020504 |
| AGTR1     | angiotensin II receptor type 1                  | 1.661825       | 0.442673       | 0.016379 |
| GALNT8    | polypeptide N-acetylgalactosaminyltransferase 8 | 1.631845       | 0.457915       | 0.020974 |
| CYP2F1    | cytochrome P450 family 2 subfamily F member 1   | 1.55567        | 0.44436        | 0.022765 |
| TOGARAM2  | TOG array regulator of axonemal microtubules 2  | 1.530427       | 0.48021        | 0.035066 |
| DNASE1L2  | deoxyribonuclease 1 like 2                      | 1.515543       | 0.406144       | 0.0169   |
| FAM221A   | family with sequence similarity 221 member A    | 1.506933       | 0.378682       | 0.01257  |
| AQP9      | aquaporin 9                                     | 1.506146       | 0.384521       | 0.013256 |
| DGAT2L6   | diacylglycerol O-acyltransferase 2 like 6       | 1.505104       | 0.480771       | 0.03797  |

220 qval: FDR adjusted p-value using Benjamini-Hochberg;  $\beta$ -value: bias estimator  
 221 analogous to fold change

222 **Table 3: Top 25 lower expressed genes in footrot affected interdigital skin**  
 223 **compared to healthy skin**

| Gene name | Description                                                                | $\beta$ -value | Standard error | q-value  |
|-----------|----------------------------------------------------------------------------|----------------|----------------|----------|
| IL-19     | interleukin 19                                                             | -2.96775       | 0.804409       | 0.017781 |
| PTGS2     | prostaglandin-endoperoxide synthase 2 (PGE2/COX2)                          | -2.8683        | 0.75813        | 0.015736 |
| MMP3      | matrix metalloproteinase 3                                                 | -2.71059       | 0.616087       | 0.007597 |
| IL-6      | interleukin-6 precursor                                                    | -2.4267        | 0.568937       | 0.008635 |
| IL-20     | interleukin 20                                                             | -2.30205       | 0.758643       | 0.04305  |
| A2ML1     | alpha-2-macroglobulin like 1                                               | -2.23879       | 0.765254       | 0.049443 |
| CCL20     | C-C motif chemokine ligand 20                                              | -2.18479       | 0.501858       | 0.007856 |
| CXCL8     | Interleukin-8                                                              | -2.10659       | 0.685411       | 0.040981 |
| SLPI      | antileukoproteinase precursor                                              | -2.04964       | 0.672506       | 0.042275 |
| MGAM      | maltase-glucoamylase                                                       | -2.02022       | 0.568845       | 0.021334 |
| MARCKSL1  | MARCKS like 1                                                              | -1.95955       | 0.631205       | 0.039119 |
| MEFV      | MEFV, pyrin innate immunity regulator                                      | -1.90552       | 0.514121       | 0.017474 |
| MMP13*    | matrix metalloproteinase 13                                                | -1.83676       | 0.523263       | 0.022523 |
| ADAMTS16  | ADAM metalloproteinase with thrombospondin type 1 motif 16                 | -1.80019       | 0.479709       | 0.016379 |
| ACOD1     | aconitate decarboxylase 1                                                  | -1.68652       | 0.563289       | 0.045291 |
| PTX3      | pentraxin 3                                                                | -1.66311       | 0.446328       | 0.016904 |
| MMP13*    | matrix metalloproteinase 13                                                | -1.65481       | 0.561768       | 0.048097 |
| ADAMTS4   | ADAM metalloproteinase with thrombospondin type 1 motif 4                  | -1.59355       | 0.394111       | 0.011418 |
| MMP1      | matrix metalloproteinase 1                                                 | -1.55518       | 0.37913        | 0.01037  |
| FOSL1     | FOS like 1, AP-1 transcription factor subunit                              | -1.51685       | 0.383897       | 0.012932 |
| MGAT3     | mannosyl (beta-1,4-)-glycoprotein beta-1,4-N-acetylglucosaminyltransferase | -1.46074       | 0.377507       | 0.014131 |
| CCL2      | C-C motif chemokine ligand 2                                               | -1.40425       | 0.325691       | 0.008232 |
| CSF3      | colony stimulating factor 3                                                | -1.4015        | 0.473053       | 0.047061 |
| PLAUR     | urokinase plasminogen activator surface receptor precursor                 | -1.36363       | 0.322566       | 0.009128 |

224 qval: FDR adjusted p-value using Benjamini-Hochberg;  $\beta$ -value: bias estimator  
 225 analogous to fold change

226 \*Splice variants

227

## 228 **Biological process enrichment**

229 Using BCCC biclustering and associated GO biological processes, the genes and  
230 conditions grouped into a total of 32 clusters. There were 2531 genes over 20  
231 samples that clustered showing upregulated biological processes including significant  
232 positive regulation. The top 15 were positive regulation of transcription (n=106,  
233 p=2.94e-26), protein folding (n=34, p=3.5e-21), regulation of DNA templated  
234 transcription (n=121, p=4.51e-21), metabolic process (n=61, p=1.44e-18), DNA  
235 templated transcription (n=63, p=1.48e-18), rRNA processing (n=20, p=9.12e-15),  
236 protein transport (n=32, p=2.08e-13), ribosome biogenesis (n=17, p=2.20e-13),  
237 osteoblast differentiation (n=24, p=4.01e-12), transcription from RNA polymerase II  
238 promotor (n=49, p=5.84e-12), negative regulation of transcript from RNA polymerase  
239 II promotor (n=63, p=7.75e-12), negative regulation of apoptotic process (n=46,  
240 p=1.91e-11), positive regulation of telomerase RNA localisation to cajal body (n=10,  
241 p=9.34e-11), proteolysis (n=63, p=1.65e-10) and translational initiation (n=16,  
242 p=1.74e-10).

243

244 There were 541 genes over 17 samples that clustered showing significant  
245 downregulation of biological process in footrot affected samples. Cluster one showed  
246 a decrease in epidermis development (n=17, p=2.3e-06), multicellular organismal  
247 water homeostasis (n=8, p=1.8e-05), peptidoglycan catabolic processes (n=4,  
248 p=4.6e-05), antimicrobial humoral response (n=7, p=9.6e-05), tissue development  
249 (n=41, p=1.1e-04), monovalent inorganic cation homeostasis (n=8, p=8.2e-4),  
250 defence response to bacteria (n=11, p=8.2e-04), fatty acid metabolic processes  
251 (n=12, p=1.3e-03), polyol transport (n=3, p=2.7e-03), skin development (n=11,  
252 p=2.7e-03), water transport (n=4, p=3.4e-03) and regulation of pH (n=6, p=3.4e-03).

253 Cluster two showed downregulation for neutrophil chemotaxis (n=7, p=4.3-e06),  
254 myeloid leukocyte migration (n=9, p=7.2e-06), leukocyte migration (n=11, p=9.8e-  
255 06), cell chemotaxis (n=10, p=2.6e-05), defence response (n=19, p=2.8e-05),  
256 immune system processes (n=26, p=4.3e-05), chemotaxis (n=12, p=1.2e-04),  
257 antimicrobial humoral response (n=5, p=1.2e-04), immune response (n=18, p=1.2e-  
258 04) and response to external stimulus (n=23, p=1.5e-04). The third cluster showed  
259 downregulation for S-adenosylhomocysteine catabolic process (n=2, p=5.7e-04)  
260 alone.

261  
262 Investigating KEGG pathway enrichment also identified cytokine-cytokine receptor  
263 interaction (n=26, p=4.5e-6), IL-17 signalling pathway (n=13, p=7.7e-08), TNF  
264 signalling pathway (n=12, p=7.7e-05) to be downregulated in the footrot affected  
265 samples. Whilst steroid hormone biosynthesis (n=7, p=2.4e-04) and ribosome  
266 biogenesis (n=31, p=4.07e-08) were upregulated.

267

### 268 **Putative Host pathogen interactions**

269 The bacterial RNA reads were aligned against the bacterial transcriptomes that were  
270 identified as those traditionally associated with ovine foot disease (*D. nodosus*, *F.*  
271 *necrophorum*, *T. pedis* and *T. denticola*) and those additionally found to be the most  
272 differentially abundant in the footrot biopsy samples (*M. fermentans* and *P.*  
273 *asaccharolytica*). These data were then used, along with the host expression data to  
274 understand correlations and host and pathogen interactions (Supplementary Table  
275 6).

276

277 The interactions were calculated with an FDR adjusted p-value using the Benjamini-  
278 Hochberg procedure. Due to the stringency of this multiple test adjustment, no

279 significance was determined. However, the raw p-values were low (in some cases <  
280 0.00005), therefore these data were investigated further but only as an indicative  
281 positive bacteria/gene correlation. Based on a raw p-value of <0.00005 there were  
282 four sheep transcripts that were associated with five *D. nodosus* genes (Table 4).  
283 From *D. nodosus* aminoacyl-histidine dipeptidase, acidic extracellular subtilisin-like  
284 protease precursor (AprV5), outer membrane protein 1E, Bacterial extracellular  
285 solute-binding protein and aminoacyl-histidine dipeptidase were identified to correlate  
286 with small nucleolar RNA, C/D box, U6 spliceosomal RNA, synapsin and U6  
287 spliceosomal RNA from *Ovis aries*. There were more correlations between *M.*  
288 *fermentans* and *Ovis aries* with a total of 15 bacterial transcripts associated with four  
289 host transcripts where raw p=0.0005. The bacterial transcripts were shown to be  
290 overwhelmingly responsible for cellular transport on both the host and pathogen side.  
291 There were a further three bacterial and sheep interactions in *T. pedis* (p=0.00005)  
292 which suggested the bacterial flagellin and host membrane protein, and a bacterial  
293 hypothetical protein and putative lipoprotein correlates with a sheep miRNA (Table  
294 4).

295

296 The correlations between the sheep transcripts and the bacterial transcripts from *F.*  
297 *necrophorum*, *P. asaccharolytica* and *T. denticola* had raw p-values of <0.0005,  
298 <0.001 and <0.004, respectively. Although low, p-values with the number of tests  
299 being performed they were not investigated any further (full data is available in  
300 Supplementary Table 6).

301

302

303 **Table 4. Correlations between bacterial and host gene expression.**

| Bacterial Species | Protein Accession | Function                                                        | <i>Ovis aries</i> Transcript accession | Function                                       | p-value            |                        |          |
|-------------------|-------------------|-----------------------------------------------------------------|----------------------------------------|------------------------------------------------|--------------------|------------------------|----------|
| D. nodosus        | ABQ13122.1        | aminoacyl-histidine dipeptidase                                 | ENSOART00000026163                     | small nucleolar RNA, C/D box                   | 1.66E-05           |                        |          |
| D. nodosus        | ABQ13667.1        | acidic extracellular subtilisin-like protease precursor (AprV5) | ENSOART00000023789                     | U6 spliceosomal RNA                            | 7.10E-05           |                        |          |
| D. nodosus        | ABQ13351.1        | outer membrane protein 1E                                       | ENSOART00000014155                     | synapsin                                       | 7.49E-05           |                        |          |
| D. nodosus        | ABQ13881.1        | Bacterial extracellular solute-binding protein                  |                                        |                                                | 7.49E-05           |                        |          |
| D. nodosus        | ABQ13122.1        | aminoacyl-histidine dipeptidase                                 | ENSOART00000023789                     | U6 spliceosomal RNA                            | 7.49E-05           |                        |          |
| M. fermentans     | WP_013526775.1    | Protein translocase subunit                                     | ENSOART00000015973                     | Pro-platelet basic protein                     | 2.88E-05           |                        |          |
| M. fermentans     | WP_013526734.1    | Putative Oligopeptide ABC transporter, ATP-binding protein      | ENSOART00000022767                     | Novel Transcript                               | 4.71E-05           |                        |          |
| M. fermentans     | WP_013526734.1    | DNA-directed RNA polymerase subunit beta                        | ENSOART00000013696                     | Potassium voltage-gated channel                | 7.04E-05           |                        |          |
| M. fermentans     | WP_013526778.1    | ATP synthase subunit beta                                       | ENSOART00000017736                     | Novel Transcript                               | 7.04E-05           |                        |          |
| M. fermentans     | ADV34079.1        | MgpA like protein                                               | ENSOART00000013889                     | CXXC Type Zinc Finger 1 CPG Binding PHD Finger | 9.28E-05           |                        |          |
| M. fermentans     | WP_013354336.1    | bifunctional oligoribonuclease/PAP phosphatase                  |                                        |                                                | 9.28E-05           |                        |          |
| M. fermentans     | WP_013526633.1    | Adenine phosphoribosyltransferase                               |                                        |                                                | 9.28E-05           |                        |          |
| M. fermentans     | ADV34286.1        | Oligopeptide ABC transporter permease protein                   |                                        |                                                | 9.28E-05           |                        |          |
| M. fermentans     | WP_013354483.1    | ABC transporter permease                                        |                                        |                                                | 9.28E-05           |                        |          |
| M. fermentans     | WP_013354556.1    | sugar ABC transporter permease                                  |                                        |                                                | 9.28E-05           |                        |          |
| M. fermentans     | ADV34629.1        | NADPH flavin oxidoreductase                                     |                                        |                                                | 9.28E-05           |                        |          |
| M. fermentans     | WP_013354747.1    | nitroreductase family protein                                   |                                        |                                                | 9.28E-05           |                        |          |
| M. fermentans     | ADV34954.1        | Transcription antitermination protein                           |                                        |                                                | 9.28E-05           |                        |          |
| M. fermentans     | WP_013527166.1    | ABC transporter ATP-binding protein                             |                                        |                                                | 9.28E-05           |                        |          |
| M. fermentans     | WP_013527168.1    | ABC transporter permease                                        |                                        |                                                | 2.88E-05           |                        |          |
| T. pedis          | WP_024465740.1    | Flagellin                                                       |                                        |                                                | ENSOART00000022912 | Novel Membrane Protein | 5.38E-05 |
| T. pedis          | WP_051150643.1    | Hypothetical Protein                                            |                                        |                                                | ENSOART00000026139 | ncRNA (MiRNA)          | 5.47E-05 |
| T. pedis          | AGT42887.1        | Putative Lipoprotein                                            | 5.47E-05                               |                                                |                    |                        |          |



305 **Collagen composition differs in the dermis of healthy and footrot tissues**

306 Since collagen composition changes in scar tissue formation, picrosirius stained  
307 tissue sections were used to differentiate collagen type I and III from each other and  
308 other collagen types. To investigate whether there were any differences in the  
309 collagen composition of the dermis, the proportions of type I, type III, non-  
310 differentiated and total collagen were calculated (Fig 4). The proportions of total and  
311 type I collagen were significantly increased in the dermis of footrot samples  
312 compared to healthy samples ( $p=0.04$  and  $0.042$ , respectively, Fig 4 A, D). The  
313 proportions of non-differentiated and type III collagen were not significantly different  
314 in the dermis layers of healthy and footrot-affected tissues (Fig 4, B-C).

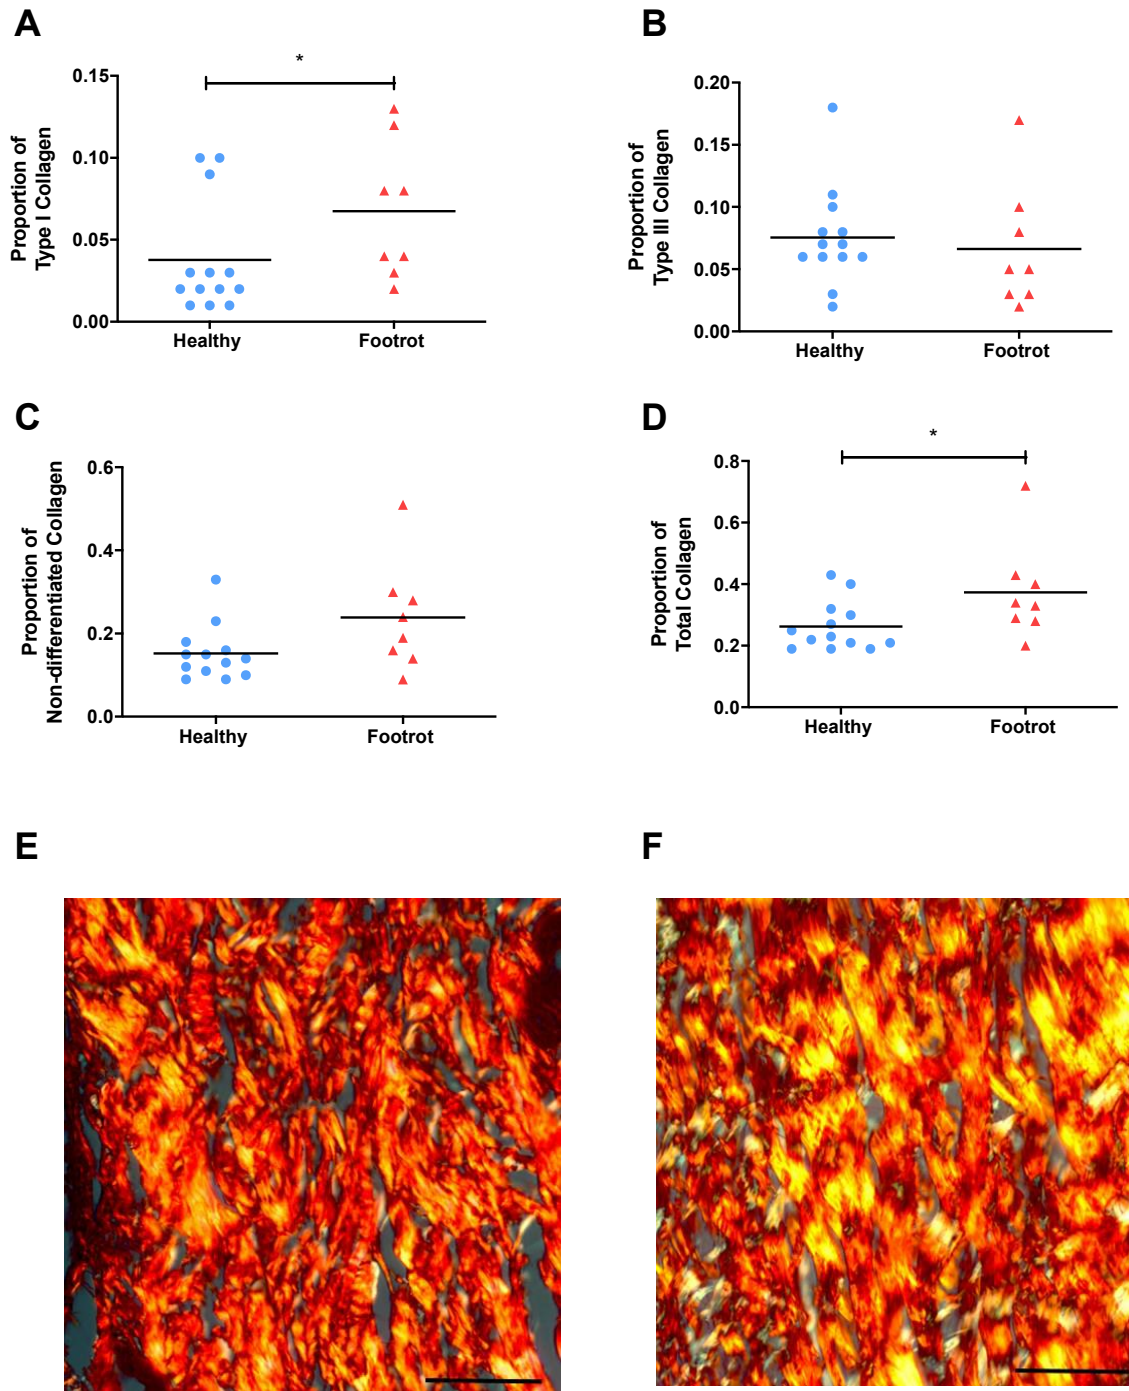

315

316 **Figure 4: Collagen expression in healthy and footrot ovine interdigital skin**

317 **dermis.** Picosirius histological staining was used to differentiate and quantify

318 collagens in healthy (n=13) and footrot (n=8) samples. Proportions of type I collagen

319 (A), type III collagen (B), undifferentiated collagens (C) and total proportion of

320 collagen (D). Representative photomicrographs showing picosirius staining under

321 phase microscopy from healthy (E) and footrot (F) samples, type I collagen stained

322 yellow, type III collagen stained green, undifferentiated collagen stained red. Scale

323 bars represent 50µm. Significance is designated by asterisk on a straight line with the

324 T-test result defined as \* =  $p \leq 0.05$ .

325

## 326 **Discussion**

327 *D. nodosus*, was established as the causative bacterium of ovine footrot in the  
328 1940's, and it has long been accepted that *F. necrophorum* plays a role in the  
329 disease aetiology (4). However, in our work we have identified additional common  
330 core species that are also associated with footrot lesions (*M. fermentans* and *P.*  
331 *asaccharolytica*) and we have shown putative interactions with the molecular host  
332 defence systems during infection in bacterial species identified as highly abundant in  
333 footrot and even without a significant difference in abundance between healthy and  
334 footrot affected such as *T. pedis*. Using paired biopsies collected from footrot  
335 affected sheep at point of slaughter we were able to comprehensively show that skin  
336 swabs are a poor proxy for identifying what bacteria are present in the tissue. This is  
337 potentially due to the bacterial contamination present from environmental sources  
338 such as faeces and soil collected during transport and grazing. However, we have  
339 shown that biopsies provide an intradermal approach to reproducibly assess  
340 differences between individual animals in an invasive infection like footrot.

341

### 342 ***The bacterial community structure of footrot***

343 Previous studies have shown the ovine interdigital bacterial community structure  
344 using 16S rDNA, with predominant bacterial genera identified as *Mycoplasma spp*,  
345 *Corynebacterium spp*, *Psychobacter spp*, *Treponema spp*, *Staphylococcus spp*,  
346 *Peptostreptococcus spp* and *Dichelobacter spp* (6, 7). The results from this study are  
347 highly congruent with what has previously been identified, however due to the greater  
348 taxonomic sensitivity afforded by metagenomics and metatranscriptomics we have  
349 been able to classify those bacterial genera to a species level. Those with differential  
350 abundance associated with footrot found on the skin surface were identified as *T.*

351 *pedis*, *T. denticola*, *D. nodosus*, and *F. necrophorum*. These species are commonly  
352 found with other ovine foot diseases, contagious ovine digital dermatitis (CODD) (21)  
353 and interdigital dermatitis (ID) (7) and the bovine foot disease bovine digital  
354 dermatitis (BDD) (18). The species with differential abundance associated with  
355 footrot intradermally were *D. nodosus*, *M. fermentans* and *P. asaccharolytica*. Given  
356 that *D. nodosus* is a poor pathogen and often requires tissue damage and the  
357 presence of other bacteria to infect, it stands to assume *P. asaccharolytica* and *M.*  
358 *fermentans* may also have an important role in disease susceptibility. These  
359 differences between healthy and footrot affected feet also extended beyond presence  
360 and absence of species to the overall bacterial diversity, with a significant drop in  
361 footrot samples. This reduction in diversity has been mirrored in CODD (21).

362

363 The benefits of using metagenomics compared to 16S rDNA studies include that the  
364 scope can be extended to incorporate archaeal and DNA virus discovery. In the  
365 current study there was a lack of correlation between either and the disease state,  
366 however, this may be unsurprising without an enrichment step or optimal DNA  
367 extraction to make them specifically more suitable for viral or archaeal identification,  
368 resulting in a poor representation for those species identified.

369

### 370 ***Host response and pathogen interactions***

371 Investigating the host pathogen interactions through correlation analysis has  
372 identified some interesting associations which warrant further investigations. The  
373 most promising appears to be the association between virulence gene *aprV5* and the  
374 *Ovis aries* transcript U6 spliceosomal RNA. This particular non-coding small nuclear  
375 RNA (snRNA) is responsible for catalysing the excision of introns and is a major

376 aspect of post translation modifications, with the ability to alter the structure, function  
377 and stability of the translated protein. In the case of infections, some species of  
378 bacteria have been implicated in hijacking the host splicing machinery and altering  
379 the splicing pattern leading to the perturbation of the host response (22, 23). Despite  
380 the lack of knowledge around the mechanism, there is evidence that certain *Listeria*,  
381 *Salmonella* and *Mycobacterium* species have the ability to produce factors that have  
382 a direct or indirect impact on the regulation of alternative splicing (23–25). Alternative  
383 splicing from the U6 spliceosomal RNA can interfere with the normal activation of T  
384 cell and B lymphocytes and the regulation of the signalling in several TLR's (TLR2,  
385 TLR3 and TLR4) (26), which could tie in with certain pathways (monovalent inorganic  
386 cation homeostasis, defence response to bacteria, skin development, neutrophil  
387 chemotaxis, leukocyte migration, defence response, immune system processes,  
388 immune response) which were identified as being downregulated in these data.

389

390 The acidic extracellular protease *aprV5* is associated with the correct cleavage of the  
391 other proteases secreted by *D. nodosus*, *AprV2* and *BprV*, to their mature active form  
392 (Han et al., 2012). Whereas the closely related *AprV2* acidic protease is a known  
393 virulence factor responsible for elastase activity and its degradation of the host extra  
394 cellular matrix (28), the role of *AprV5* in footrot is unclear. The abundance of isolates  
395 with *aprV5* has been shown to be around 25% from clinically affected farms and  
396 lacks any clear delineation between disease severity (29). However, as viral-  
397 mediated proteases have been implicated in the degradation of host small non-  
398 coding ribonucleal proteins (snRNP) (30) and other bacteria possess other  
399 mechanisms of action on snRNP's it may be an interesting focus of future studies.

400

401 ***Sheep interdigital skin microbiota and scar tissue formation in footrot***

402 The host response to the skin microbiota has to be carefully regulated as innocuous  
403 microbes and the host surveillance at epithelial barriers are in constant close  
404 proximity. In healthy tissues bacteria are located predominantly in the epidermis  
405 while tissue damage and invasive bacteria such as *D. nodosus* allow access of  
406 bacteria into deeper dermal tissue layers (10). The ovine host response to footrot  
407 demonstrated through differential expression of a range of transcripts involved in  
408 proinflammatory mediation (cytokines; IL-19, IL-20, IL-6, LIF, chemokines; CCL2,  
409 CCL20, CXCL1, CXCL8 and prostaglandin-endoperoxide synthase 2; PGE2/COX2),  
410 of matrix metalloproteases (MMP1, MMP3, MMP9, MMP13, TNC, TIMP1) and  
411 interestingly their regulators (SERPINE1, ADAMTS4, ADAMTS16) during footrot, all  
412 of which are associated with wound healing, collagen turnover and scar tissue  
413 formation. Collagen I was detected significantly more in diseased dermis than in non-  
414 infected dermal tissue leading to the conclusion that infection or co-infection clearly  
415 indicates current, or ongoing, scar formation in the dermis.

416

417 The process of second intention wound healing with scar formation is classically  
418 divided into three main overlapping phases: inflammation, proliferation, and  
419 remodelling. Localised inflammation is the first response to any breach of  
420 haemostasis with the initiation of cytokine and chemokine production leading to  
421 neutrophil and macrophage recruitment to the site of inflammation (31). The  
422 cytokines and chemokines IL-6, CCL2, CXCL1, CXCL8 identified as differentially  
423 expressed in response to footrot, are associated with acute inflammation in response  
424 to tissue injury (31, 32). In normal skin wound healing, the inflammation usually lasts  
425 for 2–5 days and ceases once the harmful stimuli have been removed. The IL-20

426 cytokine family (IL-19, IL-20, IL-22, IL-24, IL-26) contribute to various stages of this  
427 wound healing process: they are primarily secreted by infiltrating innate immune cells  
428 and lymphocytes shortly after an injury. Initially released by infiltrating macrophages,  
429 they preferentially stimulate keratinocytes to secrete antimicrobial peptides and  
430 chemokines, in order to reduce infection and accelerate inflammation, and to produce  
431 increased levels of vascular endothelial growth factor A (VEGFA), which in turn  
432 promotes angiogenesis. IL- 20 subfamily cytokines directly stimulate keratinocyte  
433 proliferation and migration, and indirectly support the proliferation of keratinocytes by  
434 enhancing the production of epidermal growth factor (EGF) and keratinocyte growth  
435 factor (KGF) (33). Surprisingly, we observed significantly reduced expressed IL-19  
436 and IL-20 transcripts in footrot samples. This was accompanied by reduced  
437 expression of secretory leucocyte protease inhibitor 1 (SLP1), a protein essential for  
438 optimal wound healing due to its antimicrobial and anti-inflammatory properties (34).  
439 Macrophages, initially producing pro-inflammatory mediators, transition in response  
440 to local immune signals to an anti-inflammatory phenotype. This promotes the  
441 resolution of inflammation and a transition to the proliferation phase of second  
442 intention wound healing focusing on re-epithelialisation through migration and  
443 proliferations of keratinocytes, deposition of type III collagen, and angiogenesis (31).  
444 Matrix metalloproteases (MMPs) are crucial to this phase as extracellular matrix  
445 degradation and deposition is essential for wound re-epithelialisation and also during  
446 tissue remodelling. MMP expression and activity are tightly controlled during wound  
447 healing, at the expression levels and through endogenous tissue inhibitors of metallo  
448 proteases (TIMPs); specific MMPs are confined to particular locations in the wound  
449 and to specific stages of wound repair (35). MMP-1, MMP-3, and MMP-9 are the  
450 major chemokine regulators during wound healing, degrading chemokines by

451 proteolysis and promoting the transition to the proliferation phase. MMPs-1, 8, 9 and  
452 13 are transiently upregulated to remodel the fibrin clot and replacing it with new  
453 extracellular matrix. In addition, they are fundamentally stimulating the migration of  
454 keratinocytes into the wound bed. During re-epithelialisation, keratinocytes migrate  
455 from the surrounding epithelium and proliferate to achieve wound closure. This is  
456 accompanied by a decreased expression of pro-migratory MMPs (MMP-1 & 2) and  
457 an increased tissue remodelling MMP-3 expression (35, 36).

458 The dysregulation of MMPs leads to prolonged inflammation and delayed wound  
459 healing (37). In footrot affected tissues we observed differential expression of the  
460 collagenases MMP-1 and 13, the gelatinase MMP-9 and the stromalysin MMP-3. It is  
461 well established that high levels of MMP-1 lead to defective re-epithelialisation, with  
462 MMP-13, expressed deeper in the tissues, leading to granulation tissue formation  
463 (37). Increased MMP-9 levels are consistent with chronic wounds, leading to the  
464 reduced expression of the growth factors required for the healing process while  
465 prolonging the inflammatory phase (37). The stromalysin MMP-3 is expressed by  
466 proliferating keratinocytes at the distal end of the wound and is essential for wound  
467 healing (37). However, we observed reduced expression compared to uninfected  
468 interdigital skin tissue, which would impact on the ability of infected interdigital skin  
469 tissue to heal. Long chain fatty acids and collagens are essential for skin barrier  
470 function (36, 38). The increase in expression of fatty acid elongases (ELOVL7,  
471 ELOVL3, ACSBG1) and of proteins involved in collagen production and collagen  
472 binding in response to footrot suggests some level of skin regeneration is ongoing.

473

474 One of the bacteria significantly increased in abundance on footrot-infected lesions,  
475 *M fermentans*, might affect the ability of host skin cells to respond to bacterial



476 infection. Chronic infections of monocytes and macrophages with intracellular low  
477 pathogenic *Mycoplasma* spp. of have been shown to impair their inflammatory  
478 response to live bacteria and bacterial products (39, 40). That we see higher  
479 transcript levels of outwardly healthy interdigital skin is in contrast to the lack of  
480 detection of MMP RNA in healthy human or murine skin (41). However, this is  
481 consistent with a marked expression of the inflammatory cytokines/chemokine IL1 $\beta$ ,  
482 IL6 and CXCL8 in outwardly healthy ovine interdigital skin, which might be due to the  
483 constant environmental changes and pressures impacting on interdigital skin or might  
484 be associated with subclinical disease that may have developed into ID and footrot in  
485 the future (7). During the remodelling phase of scar tissue formation, initially  
486 deposited collagen-III molecules are gradually replaced by type I collagen and their  
487 orientation becomes more organised (36). Mature cutaneous scars consist of 80-90%  
488 type I collagen arranged in parallel bundles (42). This particular orientation as well as  
489 less pronounced or missing rete ridges weaken the strength of the scar tissue  
490 compared to normal skin in humans to only 70-80% (36). This renders the tissue  
491 more susceptible to injury and trauma which are suspected predisposing factors of  
492 footrot. The latter might also contribute to the frequently observed relapses and  
493 underlines the not only polymicrobial but rather multifactorial aetiology of footrot. For  
494 BDD a dysfunctional skin barrier and disturbed tissue integrity is hypothesised to be  
495 an essential prerequisite for infection altogether since experimental disease models  
496 without skin maceration prior to infection fail to mirror naturally occurring BDD lesions  
497 appropriately (43).

498

499 Currently there is conflicting evidence of the impact of the microbiome on wound  
500 healing, with some evidence of host commensal interactions promoting wound

501 healing while colonisation of pathogenic bacteria may invade deeper into tissues or  
502 lead to chronic infections and biofilm formation (44, 45). In the context of footrot, we  
503 identified another bacterial species in addition to *D. nodosus* that is associated with  
504 footrot and also known to be a synergistic wound pathogen, *P. asaccharolytica*.  
505 When present in combination with anaerobic and aerobic bacteria such as *Prevotella*  
506 *melaninogenicus*, *Peptostreptococcus micro* and *Klebsiella pneumoniae*, *P.*  
507 *asacharolytica* exacerbates the disease process (46–48). While antibiotic injections  
508 will affect indiscriminately on commensal and pathogenic bacteria, the effectiveness  
509 of parenteral antibiotics in footrot demonstrate their high impact on the pathogenic  
510 bacteria leading to swift recovery in most cases (49). Interestingly, resistance genes  
511 against tetracycline, the most commonly used antibiotic against footrot have so far  
512 not been identified in *D. nodosus* genome sequences, suggesting that the antibiotic  
513 treatment mainly affects other microbes of that polymicrobial infection enabling host  
514 immune system to eliminate *D. nodosus*.

515

## 516 **Conclusion**

517 Ovine footrot is a complex polymicrobial disease and there is a clear need to further  
518 elucidate the intricate host microbial interactions. We aimed to investigate the host  
519 response as well as the microbial taxa in tissues and their intra-tissue expression  
520 levels using metatranscriptomics in naturally infected tissues. It is well published that  
521 skin damage is required to allow *D. nodosus* infection to establish (2, 50). As  
522 expected, the host response in footrot is characterized by differential expression of  
523 proteins with roles in wound healing and chronic wounds. As in the absence of *D.*  
524 *nodosus*, interdigital dermatitis resolves, the presence of *D. nodosus* may be  
525 essential to allow the establishment of the microbes associated with under running  
526 footrot, including *P. asaccharolytica*. In these later stages of disease, the presence of

527 those bacteria, such as *M. fermentans*, may contribute to a dampening of the  
528 immune response unable to remove the invading bacterial pathogens leading to  
529 chronic infection.

530

## 531 **Materials and Methods**

532

### 533 ***Sample collection***

534 Sheep were assessed post slaughter for foot health. Any individual animals showing  
535 signs of footrot were selected for sample collection. Debris was removed from all the  
536 feet and cleaned using purified water. Sterile nylon flock swabs (E-swabs 480CE,  
537 Copan U.S.A.) were taken from the interdigital space and stored in liquid Amies  
538 media at 5°C overnight. The foot was then washed with a chlorohexidine solution  
539 (National Veterinary Services, U.K.). Any hair was removed from the feet with  
540 scissors, prior to the collection of an 8mm biopsy using a punch (National Veterinary  
541 Services, U.K.). Biopsies were placed in RNALater (Sigma Aldrich, U.K.), stored at  
542 5°C overnight before being frozen at -80°C.

543

### 544 ***DNA Extraction from swabs***

545 The interdigital space swabs were placed on a MixMate (ThermoFisher, U.K.) for 5  
546 minutes at 800rpm to thoroughly disperse the bacteria in the amies solution from the  
547 swab. The liquid was transferred into a low-bind 1.5ml tube and centrifuged at 12,000  
548 rpm for 5 minutes. The supernatant was removed, and the pellets were resuspended  
549 in 200µl of RNase-free molecular biology grade water (Thermo Fisher, U.K.) (51).  
550 DNA was isolated using the Qiagen Cador Pathogen Mini Kit, following the

551 manufacturer's guidelines, eluted in 60µl of elution buffer. The DNA samples were  
552 quantified using the Qubit 3.0 and dsDNA high sensitivity dye (Qiagen).

553

#### 554 ***RNA Extraction***

555 Biopsies were thawed on ice before being cut into approximately 30mg sections. One  
556 section was added to a MACs M tube (Miltenyi Biotech, U.K.) containing 1ml Qiazol  
557 (Qiagen, U.K.) and dissociated on a GentleMACs (Miltenyi Biotech, U.K.) using the  
558 manufacturer's RNA settings. The sample was centrifuged and incubated at room  
559 temperature (RT) for 5 minutes before transferring the lysate to a 1.5ml centrifuge  
560 tube. Proteinase K (20µl) was added to the sample before being incubated at 56°C  
561 for an hour. Chloroform (200µl) was added and shaken vigorously for 15 seconds.  
562 The sample was then incubated at RT for 2 minutes before being centrifuged at  
563 12,000xg for 15 minutes at 4°C. The upper aqueous phase was transferred to a fresh  
564 1.5ml centrifuge tube before the addition of 1x volume of 70% ethanol. The sample  
565 (up to 700µl) was added to an RNeasy Mini Spin column (Qiagen, U.K.) and  
566 centrifuged at RT at 8000xg for 30 seconds. Any remaining sample was also passed  
567 through the column. All remaining steps followed the manufacturer's guidelines with  
568 elution in 30µl of RNase-free molecular biology grade water (Thermo Fisher, U.K.).

569

#### 570 ***Dual RNA Sequencing***

571 The extracted RNA was quantified using the Agilent Bioanalyser RNA Nano 6000 kit.  
572 Healthy foot sample RNA with a RIN score of  $\geq 7$  and footrot sample RNA with a  
573 DV200  $> 85$  was chosen for sequencing. The samples were treated using the  
574 RiboZero Gold (epidemiology) ribosomal depletion kit (Illumina, U.S.A.) and prepared  
575 for sequencing using Illumina TruSeq library preparation (Illumina, U.S.A.). The

576 samples were sequenced on a HiSeq 3000 using 150bp paired end chemistry (Leeds  
577 Institute of Molecular Medicine, sequencing facility) at 6 libraries per lane over 14  
578 lanes giving approximately 75 million reads per sample.

579

### 580 **Data Analysis**

581 All analysis was carried out using default settings unless stated. Raw reads were  
582 analysed for quality and adaptor removal using Skewer (52). An initial step for the  
583 RNASeq data consisted of aligning the reads with HISAT2 (53) against the sheep  
584 genome (Oar\_v3.1, downloaded 21/07/2017) (54) to separate the ovine and potential  
585 bacterial transcripts. The sheep reads were then parsed for transcript alignment  
586 using Kallisto (55) and the sheep genome (Oar\_v3.1, downloaded 21/07/2017) (54).  
587 Differential analysis was calculated with Sleuth (56). The differentially expressed  
588 genes were imported in R (57) and clustered using BiClust and the Block Correlated  
589 Coupled Clustering (58). The reads which did not align to the sheep genome and the  
590 metagenomic reads were used as input for taxonomic assignment and bacterial  
591 populations were determined with Kraken (59), false positives were identified with  
592 KrakenUniq (60) and results were filtered with MAG\_TaxaAssigner  
593 (<https://github.com/shekas3/BinTaxaAssigner>).

594

595

### 596 **Confirmation of selected bacterial species by PCR or qPCR**

597 Parallel tissue samples from the same foot as for RNA isolation were used. Tissue  
598 homogenisation and DNA extractions were performed as described previously using  
599 QIAamp Cador kit (Qiagen) (61). The DNA samples were quantified using the Qubit  
600 3.0 and dsDNA high sensitivity dye (Qiagen). Bacterial load was quantified using  
601 real-time PCR based on 16S rRNA gene for eubacteria (62) and *D. nodosus* (63), *F.*

602 *necrophorum* subspecies *necrophorum* primers targeted the *gyrB* gene (51). *M.*  
603 *fermentans* sequences were amplified by species specific PCR for 16S rRNA (64)  
604 and *P. asaccharolytica* sequences were amplified by PCR (65) followed by  
605 sequencing (Eurofins Genomics).

606

### 607 **Correlation Testing**

608 Both tests were performed using the same dataset. For each of the samples (biopsy,  
609 swab and host), each of the bacteria species were labelled as either present or  
610 absent in each sample. A difference score was prescribed if species was present in  
611 one of the swab or biopsy samples from a sheep but, not both (i.e., the swab and  
612 biopsy gave different results for the presence of the species). If present in both or  
613 neither the biopsy nor swab samples for then. A t-test statistic was calculated by  
614 taking the sum of all differences across all sheep. To perform the randomisation  
615 procedure the labels of the original 52 samples (sheep and sample type) were  
616 randomly reassigned and the test statistic recalculated. This procedure was repeated  
617 10 000 times, giving randomised test statistics.

618

### 619 **Host Pathogen Interactions**

620 To identify putative host pathogen interactions the correlation script PHnder was  
621 used (<https://github.com/addyblanch/PHnder>). Briefly, samples with zero  
622 assignments were removed, and a minimum presence value was set to one. A new  
623 data matrix was formed and the hypergeometric distribution was calculated using  
624 phyper  
625 (<https://www.rdocumentation.org/packages/stats/versions/3.6.2/topics/Hypergeometri>  
626 [c](#)) and a probability, producing a significance (p) value and adjusted p value.

627 ***Tissue staining, image capture and analysis***

628 Biopsies were processed in ethanol and xylene, mounted in paraffin and 7 µm thick  
629 serial sections collected throughout the tissue onto polysilinated microscope slides.  
630 The paraffin from each tissue section was melted at 60°C for 5-10min, followed by  
631 immersed in xylene twice for 5min each to remove the paraffin. Tissue sections were  
632 then rehydrated in 100% ethanol, 90% ethanol, 70 % ethanol and distilled water for  
633 5min each. Picrosirius red (PS) stain was used to differentiate and quantify collagen  
634 types I, III and undifferentiated collagens using the picrosirius stain kit (Polysciences,  
635 Inc., Pennsylvania, USA). The observer was blinded to the sample identification to  
636 avoid subconscious bias. Images were captured using a Leica CTR500 microscope  
637 (Leica Microsystems, Germany) with or without polarised light. For each sample,  
638 three sections approximately 400 µm apart were analysed. At 40x magnification, five  
639 non-overlapping photos were taken from each section from the dermis of PS stained  
640 sections (330 photomicrographs analysed).

641  
642 For 13 healthy and 8 footrot samples, 15 photomicrographs per sample were  
643 captured (systematic random sampling) and analysed using Image-Pro Plus (Media  
644 Cybernetics, Inc, Pennsylvania, USA) to quantify the area of collagen in each image,  
645 with separate measurements for type III (green), type I (yellow) and undifferentiated  
646 (red) collagen (315 images analysed in total). Total collagen proportion was  
647 calculated as the sum of type III, type I and undifferentiated collagen proportions.

648

649 ***Statistical analysis***

650 The taxonomic count data were analysed for statistically significant differences in R  
651 (57) using the edgeR wrapper (66) as part of the Phyloseq package (67). Diversity

652 statistics were calculated using vegan (68) and differences were calculated using  
653 Mann-Whitney U tests in Prism 8.01 (GraphPad Software Inc. USA).

654

655 Statistical analyses of histology images were performed on GraphPad Prism version  
656 6 for windows. Resulting data were presented as frequencies and percentages and  
657 were analysed by student T-test or Kruskal Wallis test, dependent on data  
658 distribution. Analysis was taken as significant when  $p \leq 0.05$ .

659

### 660 **Author Contributions**

661 AMB and ST developed the idea, designed, and supervised the experiments and  
662 alongside SW, CMB, JKM and GE have written the manuscript. AMB completed the  
663 bioinformatics analysis. CES, CMB and JKM carried out the lab work, NN performed  
664 and analysed bacterial qPCR. CR and CB performed and analysed the collagen  
665 assays. LS performed additional statistical and mathematical assessment of the data.  
666 All authors have read the manuscript.

667

### 668 **Ethical Statement**

669 This study was reviewed and approved by the University of Nottingham, School of  
670 Veterinary Medicine and Science ethical review committee ERN: 1144 140506 (Non  
671 ASPA).

672

### 673 **Funding**

674 This work was supported by the Biotechnology and Biological Sciences Research  
675 Council [grant number BB/M012085/1] (BBSRC) Animal Health Research Club 2014  
676 and the University of Nottingham. NB was funded by BBSRC STARs scheme (2017-



677 2019). GE & SRW were also funded by the Scottish Government Rural and  
678 Environment Science and Analytical Services (RESAS) GE and SRW also received  
679 funding from the European Union's Horizon 2020 research and innovation  
680 programme under grant agreement No. 731014 (VetBioNet). The funders had no role  
681 in the design of the study, collection, analysis, interpretation of the data nor in the  
682 writing of the manuscript.

683

#### 684 **Competing Financial Interests**

685 All the authors state that there is no competing financial interest in the production of  
686 this manuscript.

687

#### 688 **Acknowledgements**

689 The authors would like to thank Professor Christoph Mülling for helping facilitate this  
690 research collaboration with the Faculty of Veterinary Medicine, Leipzig University.

691 The authors would also like to thank Dr Ian Carr and Ummey Hany at The Leeds  
692 Institute for Molecular Medicine Sequencing Facility for all their experimental  
693 suggestions and sequencing support.

694

#### 695 **Open Access Data**

696 All sequence data generated for this study is held in the NCBI SRA under the  
697 accession number PRJNA725378.

## 698 **References**

- 699 1. Kaler J, Medley GF, Grogono-Thomas R, Wellington EM, Calvo-Bado LA, Wassink  
700 GJ, King EM, Moore LJ, Russell C, Green LE. 2010. Factors associated with  
701 changes of state of foot conformation and lameness in a flock of sheep. *Prev Vet*  
702 *Med* 97:237–244.
- 703 2. Beveridge W. 1941. Foot-rot in sheep: A transmissible disease due to infection  
704 with *Fusiformis nodosus* (n. sp.). Studies on its cause, epidemiology, and control.  
705 *Bull Counc Sci Ind Res Aust* 140:1–58.
- 706 3. Beveridge W. 1936. a Study of *Spirochaeta Penortha* (N.Sp.) Isolated From Foot-  
707 Rot in Sheep. *Immunol Cell Biol* 14:307–318.
- 708 4. Egerton JR, Roberts DS, Parsonson I. 1969. The Aetiology and Pathogenesis of  
709 ovine Footrot. *J Comp Pathol* 79:207–217.
- 710 5. Roberts DS, Foster WH, Kerry JB, Calder HA. 1972. An alum-treated vaccine for  
711 the control of foot-rod in sheep. *Vet Rec* 91:428–429.
- 712 6. Calvo-Bado LA, Oakley BB, Dowd SE, Green LE, Medley GF, UI-Hassan A,  
713 Bateman V, Gaze W, Witcomb L, Grogono-Thomas R, Kaler J, Russell CL,  
714 Wellington EM. 2011. Ovine pedomics: the first study of the ovine foot 16S rRNA-  
715 based microbiome. *ISME J* 5:1426–1437.
- 716 7. Maboni G, Blanchard A, Frosth S, Stewart C, Emes R, Töttemeyer S. 2017. A  
717 distinct bacterial dysbiosis associated skin inflammation in ovine footrot. *Sci Rep*  
718 7:45220.
- 719 8. Ramírez AS, Fleitas JL, Rosales RS, Poveda C, de la Fe C, Andrada M, Castro A,  
720 Poveda JB. 2008. A semi-defined medium without serum for small ruminant  
721 mycoplasmas. *Vet J* 178:149–152.

- 722 9. Juni E, Heym GA. 1986. *Psychrobacter immobilis* gen. nov., sp. nov.:  
723 Genospecies Composed of Gram-Negative, Aerobic, Oxidase-Positive Coccobacilli.  
724 *Int J Syst Bacteriol* 36:388–391.
- 725 10. Agbaje M, Rutland CS, Maboni G, Blanchard A, Bexon M, Stewart C, Jones MA,  
726 Totemeyer S. 2018. Novel inflammatory cell infiltration scoring system to investigate  
727 healthy and footrot affected ovine interdigital skin. *PeerJ* 6:e5097.
- 728 11. Westermann AJ, Gorski S a., Vogel J. 2012. Dual RNA-seq of pathogen and  
729 host. *Nat Rev Microbiol* 10:618–630.
- 730 12. Westermann AJ, Barquist L, Vogel J. 2017. Resolving host–pathogen interactions  
731 by dual RNA-seq. *PLOS Pathog* 13:e1006033.
- 732 13. Pérez-Losada M, Castro-Nallar E, Bendall ML, Freishtat RJ, Crandall KA. 2015.  
733 Dual transcriptomic profiling of host and microbiota during health and disease in  
734 pediatric asthma. *PLoS ONE* 10:1–17.
- 735 14. Nowicki EM, Shroff R, Singleton JA, Renaud DE, Wallace D, Drury J, Zirnheld J,  
736 Colleti B, Ellington AD, Lamont RJ, Scott DA, Whiteley M. 2018. Microbiota and  
737 Metatranscriptome Changes Accompanying the Onset of Gingivitis. *mBio* 9:e00575-  
738 18.
- 739 15. Ram-Mohan N, Meyer MM. 2020. Comparative Metatranscriptomics of  
740 Periodontitis Supports a Common Polymicrobial Shift in Metabolic Function and  
741 Identifies Novel Putative Disease-Associated ncRNAs. *Front Microbiol* 11:482.
- 742 16. Marcatili P, Nielsen MW, Sicheritz-Pontén T, Jensen TK, Schafer-Nielsen C,  
743 Boye M, Nielsen M, Klitgaard K. 2016. A novel approach to probe host-pathogen  
744 interactions of bovine digital dermatitis, a model of a complex polymicrobial infection.  
745 *BMC Genomics* 17:987.

- 746 17. Bay V, Griffiths B, Carter S, Evans NJ, Lenzi L, Bicalho RC, Oikonomou G. 2018.  
747 16S rRNA amplicon sequencing reveals a polymicrobial nature of complicated claw  
748 horn disruption lesions and interdigital phlegmon in dairy cattle. *Sci Rep* 8:1–12.
- 749 18. Krull AC, Shearer JK, Gorden PJ, Cooper VL, Phillips GJ, Plummer PJ. 2014.  
750 Deep Sequencing Analysis Reveals Temporal Microbiota Changes Associated with  
751 Development of Bovine Digital Dermatitis. *Infect Immun* 82:3359–3373.
- 752 19. Sullivan LE, Clegg SR, Angell JW, Newbrook K, Blowey RW, Carter SD, Bell J,  
753 Duncan JS, Grove-White DH, Murray RD, Evans NJ. 2015. High-level association of  
754 bovine digital dermatitis *treponema* spp. with contagious ovine digital dermatitis  
755 lesions and presence of *fusobacterium necrophorum* and *dichelobacter nodosus*. *J*  
756 *Clin Microbiol* 53:1628–1638.
- 757 20. Zinicola M, Higgins H, Lima S, Machado V, Guard C, Bicalho R. 2015. Shotgun  
758 metagenomic sequencing reveals functional genes and microbiome associated with  
759 bovine digital dermatitis. *PLoS ONE* 10:1–17.
- 760 21. Duncan JS, Angell JW, Richards P, Lenzi L, Staton GJ, Grove-White D, Clegg S,  
761 Oikonomou G, Carter SD, Evans NJ. 2021. The dysbiosis of ovine foot microbiome  
762 during the development and treatment of contagious ovine digital dermatitis. *Anim*  
763 *Microbiome* 3:19.
- 764 22. Kalam H, Fontana MF, Kumar D. 2017. Alternate splicing of transcripts shape  
765 macrophage response to *Mycobacterium tuberculosis* infection. *PLOS Pathog*  
766 13:e1006236.
- 767 23. Pai AA, Baharian G, Pagé Sabourin A, Brinkworth JF, Nédélec Y, Foley JW,  
768 Grenier J-C, Siddle KJ, Dumaine A, Yotova V, Johnson ZP, Lanford RE, Burge CB,  
769 Barreiro LB. 2016. Widespread Shortening of 3' Untranslated Regions and Increased

- 770 Exon Inclusion Are Evolutionarily Conserved Features of Innate Immune Responses  
771 to Infection. *PLOS Genet* 12:e1006338.
- 772 24. Luo Z, Li Z, Chen K, Liu R, Li X, Cao H, Zheng SJ. 2012. Engagement of  
773 heterogeneous nuclear ribonucleoprotein M with listeriolysin O induces type I  
774 interferon expression and restricts *Listeria monocytogenes* growth in host cells.  
775 *Immunobiology* 217:972–981.
- 776 25. Penn BH, Netter Z, Johnson JR, Dollen JV, Jang GM, Johnson T, Ohol YM,  
777 Maher C, Bell SL, Geiger K, Golovkine G, Du X, Choi A, Parry T, Mohapatra BC,  
778 Storck MD, Band H, Chen C, Jäger S, Shales M, Portnoy DA, Hernandez R, Coscoy  
779 L, Cox JS, Krogan NJ. 2018. An *Mtb*-Human Protein-Protein Interaction Map  
780 Identifies a Switch between Host Antiviral and Antibacterial Responses. *Mol Cell*  
781 71:637-648.e5.
- 782 26. Chauhan K, Kalam H, Dutt R, Kumar D. 2019. RNA Splicing: A New Paradigm in  
783 Host–Pathogen Interactions. *J Mol Biol* 431:1565–1575.
- 784 27. Han X, Kennan RM, Steer DL, Smith AI, Whisstock JC, Rood JI. 2012. The  
785 AprV5 Subtilase Is Required for the Optimal Processing of All Three Extracellular  
786 Serine Proteases from *Dichelobacter nodosus*. *PLOS ONE* 7:8.
- 787 28. Kennan RM, Wong W, Dhungyel OP, Han X, Wong D, Parker D, Rosado CJ, Law  
788 RHP, McGowan S, Reeve SB, Levina V, Powers GA, Pike RN, Bottomley SP, Smith  
789 AI, Marsh I, Whittington RJ, Whisstock JC, Porter CJ, Rood JI. 2010. The Subtilisin-  
790 Like Protease AprV2 Is Required for Virulence and Uses a Novel Disulphide-  
791 Tethered Exosite to Bind Substrates. *PLoS Pathog* 6:e1001210.
- 792 29. Stäuble A, Steiner A, Normand L, Kuhnert P, Frey J. 2014. Molecular genetic  
793 analysis of *Dichelobacter nodosus* proteases AprV2/B2, AprV5/B5 and BprV/B in  
794 clinical material from European sheep flocks. *Vet Microbiol* 168:177–184.

- 795 30. Álvarez E, Castelló A, Carrasco L, Izquierdo JM. 2013. Poliovirus 2A Protease  
796 Triggers a Selective Nucleo-Cytoplasmic Redistribution of Splicing Factors to  
797 Regulate Alternative Pre-mRNA Splicing. *PLoS ONE* 8:e73723.
- 798 31. Ellis S, Lin EJ, Tartar D. 2018. Immunology of Wound Healing. *Curr Dermatol*  
799 *Rep* 7:350–358.
- 800 32. Hua Y, Bergers G. 2019. Tumors vs. Chronic Wounds: An Immune Cell's  
801 Perspective. *Front Immunol* 10:2178.
- 802 33. Rutz S, Wang X, Ouyang W. 2014. The IL-20 subfamily of cytokines — from host  
803 defence to tissue homeostasis. *Nat Rev Immunol* 14:783–795.
- 804 34. Ashcroft GS, Lei K, Jin W, Longenecker G, Kulkarni AB, Greenwell-Wild T, Hale-  
805 Donze H, McGrady G, Song X-Y, Wahl SM. 2000. Secretory leukocyte protease  
806 inhibitor mediates non-redundant functions necessary for normal wound healing. *Nat*  
807 *Med* 6:1147–1153.
- 808 35. Caley MP, Martins VLC, O'Toole EA. 2015. Metalloproteinases and Wound  
809 Healing. *Adv Wound Care* 4:225–234.
- 810 36. Marshall CD, Hu MS, Leavitt T, Barnes LA, Lorenz HP, Longaker MT. 2018.  
811 Cutaneous Scarring: Basic Science, Current Treatments, and Future Directions. *Adv*  
812 *Wound Care* 7:29–45.
- 813 37. Krishnaswamy VR, Mintz D, Sagi I. 2017. Matrix metalloproteinases: The  
814 sculptors of chronic cutaneous wounds. *Biochim Biophys Acta BBA - Mol Cell Res*  
815 1864:2220–2227.
- 816 38. Uchida Y. 2011. The role of fatty acid elongation in epidermal structure and  
817 function. *Dermatoendocrinol* 3:65–69.
- 818 39. Nolan TJ, Gadsby NJ, Hellyer TP, Templeton KE, McMullan R, McKenna JP,  
819 Rennie J, Robb CT, Walsh TS, Rossi AG, Conway Morris A, Simpson AJ. 2016. Low-

820 pathogenicity *Mycoplasma* spp. alter human monocyte and macrophage function and  
821 are highly prevalent among patients with ventilator-acquired pneumonia. *Thorax*  
822 71:594–600.

823 40. Zakharova E, Grandhi J, Wewers MD, Gavrilin MA. 2010. *Mycoplasma*  
824 Suppression of THP-1 Cell TLR Responses Is Corrected with Antibiotics. *PLoS ONE*  
825 5:e9900.

826 41. McCarty SM, Cochrane CA, Clegg PD, Percival SL. 2012. The role of  
827 endogenous and exogenous enzymes in chronic wounds: A focus on the implications  
828 of aberrant levels of both host and bacterial proteases in wound healing: Host and  
829 bacterial proteases in wound healing. *Wound Repair Regen* 20:125–136.

830 42. Lawrence WT. 1998. Physiology of the acute wound. *Clin Plast Surg* 25:321–340.

831 43. Krull AC, Cooper VL, Coatney JW, Shearer JK, Gorden PJ, Plummer PJ. 2016. A  
832 Highly Effective Protocol for the Rapid and Consistent Induction of Digital Dermatitis  
833 in Holstein Calves. *PLOS ONE* 11:e0154481.

834 44. Johnson T, Gómez B, McIntyre M, Dubick M, Christy R, Nicholson S, Burmeister  
835 D. 2018. The Cutaneous Microbiome and Wounds: New Molecular Targets to  
836 Promote Wound Healing. *Int J Mol Sci* 19:2699.

837 45. Tomic-Canic M, Burgess JL, O'Neill KE, Strbo N, Pastar I. 2020. Skin Microbiota  
838 and its Interplay with Wound Healing. *Am J Clin Dermatol* 21:36–43.

839 46. Bowler PG, Duerden BI, Armstrong DG. 2001. Wound Microbiology and  
840 Associated Approaches to Wound Management. *CLIN MICROBIOL REV* 14:26.

841 47. Mayrand D, McBride BC. 1980. Ecological Relationships of Bacteria Involved in a  
842 Simple, Mixed Anaerobic Infection. *INFECT IMMUN* 27:7.

- 843 48. Sundqvist GK, Eckerbom MI, Larsson AP, Sjögren UT. 1979. Capacity of  
844 anaerobic bacteria from necrotic dental pulps to induce purulent infections. *Infect*  
845 *Immun* 25:685–693.
- 846 49. Jordan D, Nicol' H, Jessep' T, Scrivener C. 1996. Factors associated with the  
847 effectiveness of antibiotic treatment for ovine virulent footrot 5.
- 848 50. Graham NPH, Egerton JR. 1968. PATHOGENESIS OF OVINE FOOT-ROT: THE  
849 ROLE OF SOME ENVIRONMENTAL FACTORS. *Aust Vet J* 44:235–240.
- 850 51. Frosth S, König U, Nyman A-KK, Pringle M, Aspán A, König U, Nyman A-KK,  
851 Pringle M, Aspan A. 2015. Characterisation of *Dichelobacter nodosus* and detection  
852 of *Fusobacterium necrophorum* and *Treponema* spp. in sheep with different clinical  
853 manifestations of footrot. *Vet Microbiol* 179:82–90.
- 854 52. Jiang H, Lei R, Ding S-W, Zhu S. 2014. Skewer: a fast and accurate adapter  
855 trimmer for next-generation sequencing paired-end reads. *BMC Bioinformatics*  
856 15:182.
- 857 53. Kim D, Langmead B, Salzberg SL. 2015. HISAT: A fast spliced aligner with low  
858 memory requirements. *Nat Methods* 12:357–360.
- 859 54. Archibald AL, Cockett NE, Dalrymple BP, Faraut T, Kijas JW, Maddox JF,  
860 McEwan JC, Hutton Oddy V, Raadsma HW, Wade C, Wang J, Wang W, Xun X.  
861 2010. The sheep genome reference sequence: A work in progress. *Anim Genet*  
862 41:449–453.
- 863 55. Bray NL, Pimentel H, Melsted P, Pachter L. 2016. Near-optimal probabilistic  
864 RNA-seq quantification. *Nat Biotechnol* 34:525–527.
- 865 56. Pimentel H, Bray NL, Puente S, Melsted P, Pachter L. 2017. Differential analysis  
866 of RNA-seq incorporating quantification uncertainty. *Nat Methods* 14:687–690.



- 867 57. Ihaka R, Gentleman R. 1996. R: A Language for Data Analysis and Graphics. *J*  
868 *Comput Graph Stat* 5:299–314.
- 869 58. Cheng Y, Church GM. 2000. Biclustering of Expression Data. *Proc Int Conf Intell*  
870 *Syst Mol Biol* 11.
- 871 59. Wood DE, Salzberg SL. 2014. Kraken: ultrafast metagenomic sequence  
872 classification using exact alignments. *Genome Biol* 15:R46.
- 873 60. Breitwieser FP, Baker DN, Salzberg SL. 2018. KrakenUniq: confident and fast  
874 metagenomics classification using unique k-mer counts. *Genome Biol* 19:198.
- 875 61. Maboni G, Frosth S, Aspán A, Töttemeyer S. 2016. Ovine footrot: New insights  
876 into bacterial colonisation. *Vet Rec* 179.
- 877 62. Strub S, Van Der Ploeg JR, Nuss K, Wyss C, Luginbühl A, Steiner A. 2007.  
878 Quantitation of *Gugenheimella bovis* and treponemes in bovine tissues related to  
879 digital dermatitis. *FEMS Microbiol Lett* 269:48–53.
- 880 63. Frosth S, Sletteameas JS, Jorgensen HJ, Angen O, Aspan A. 2012. Development  
881 and comparison of a real-time PCR assay for detection of *Dichelobacter nodosus*  
882 with culturing and conventional PCR: harmonisation between three laboratories. *Acta*  
883 *Vet Scand* 54:6.
- 884 64. Kuppeveld F Van. 1992. Genus-and species-specific identification of  
885 mycoplasmas by 16S rRNA amplification. *Appl ...* 58:2606–2615.
- 886 65. Tran T, Flynn MJ, Chen C, Slots J. 1997. Absence of *Porphyromonas*  
887 *asaccharolytica*, *Bacteroides fragilis* and *Chlamydia pneumoniae* in human  
888 subgingival plaque. *Oral Microbiol Immunol* 12:377–378.
- 889 66. Robinson M, McCarthy D, Chen Y, Smyth GKG. 2013. edgeR: differential  
890 expression analysis of digital gene expression dataUser's Guide. *R Man* 1–76.

- 891 67. McMurdie PJ, Holmes S. 2013. phyloseq: an R package for reproducible  
892 interactive analysis and graphics of microbiome census data. PLoS One 8:e61217.
- 893 68. Oksanen J, Blanchet FG, Friendly M, Kindt R, Legendre P, McGlenn D, Minchin  
894 PR, O'Hara RB, Simpson GL, Solymos P, Stevens MHH, Szoecs E, Wagner H. 2018.  
895 vegan: Community Ecology Package. CRAN R.
